# Supplementary material
Source: publisher site journal article supplement (https://www.dovepress.com/article/357166)
Supplement: Supplementary file 1 [file get_supplementary_file.php]

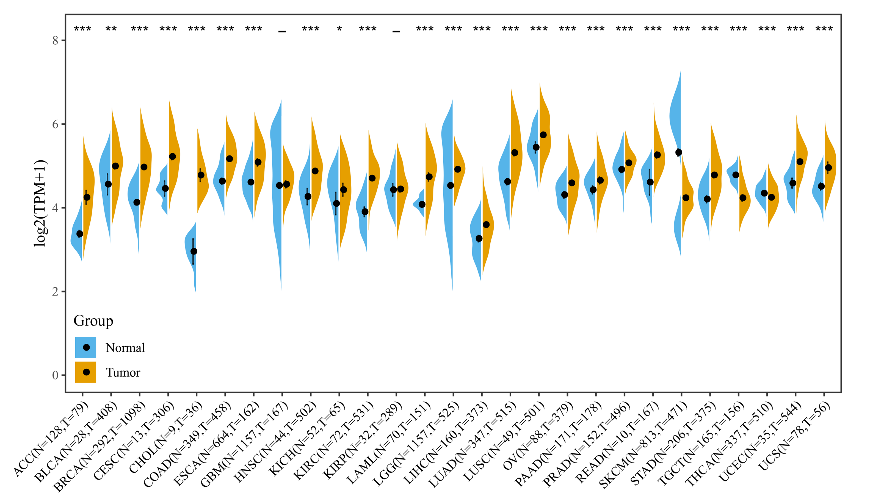


**Supplementary Figure 1.** Expression of RAB40C in tumor and normal tissues from TCGA and Genotype-Tissue Expression (GTEx) cohorts. **p*<0.05; ***p*<0.01; ****p*<0.001.


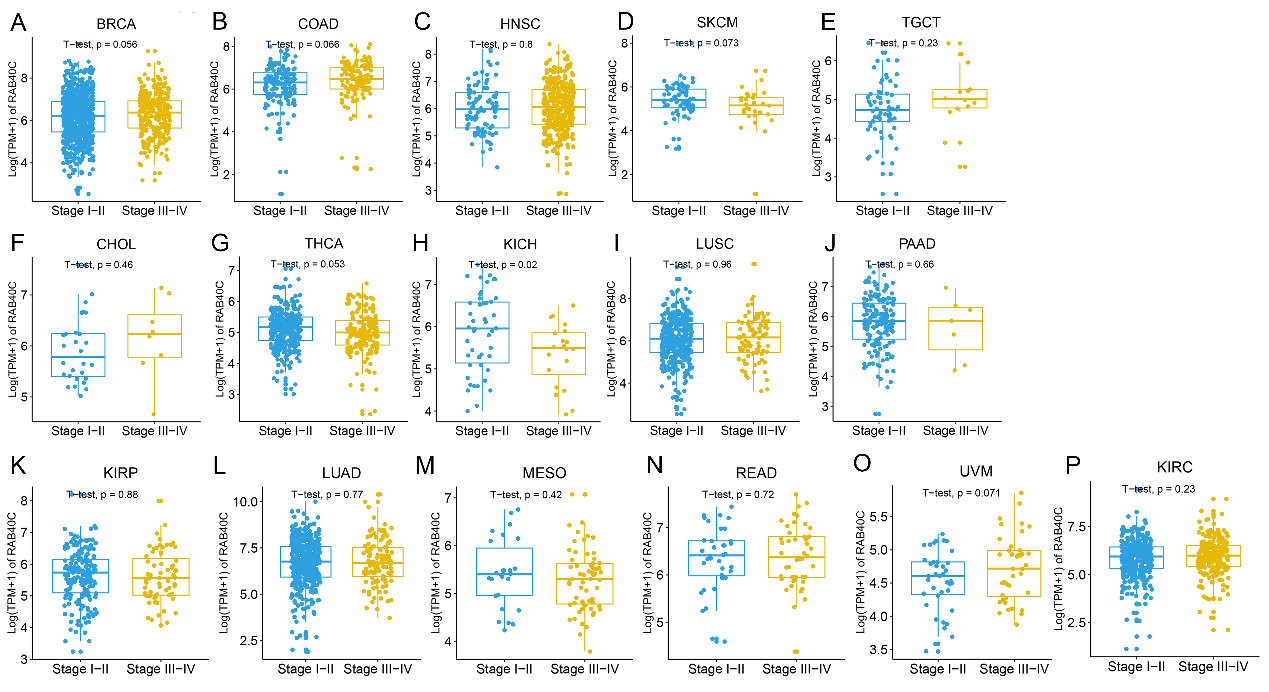


**Supplementary Figure 2.** (A–P): RAB40C expression in increasing trend in different WHO stages of pan-cancer but with no significance (*p*>0.05).


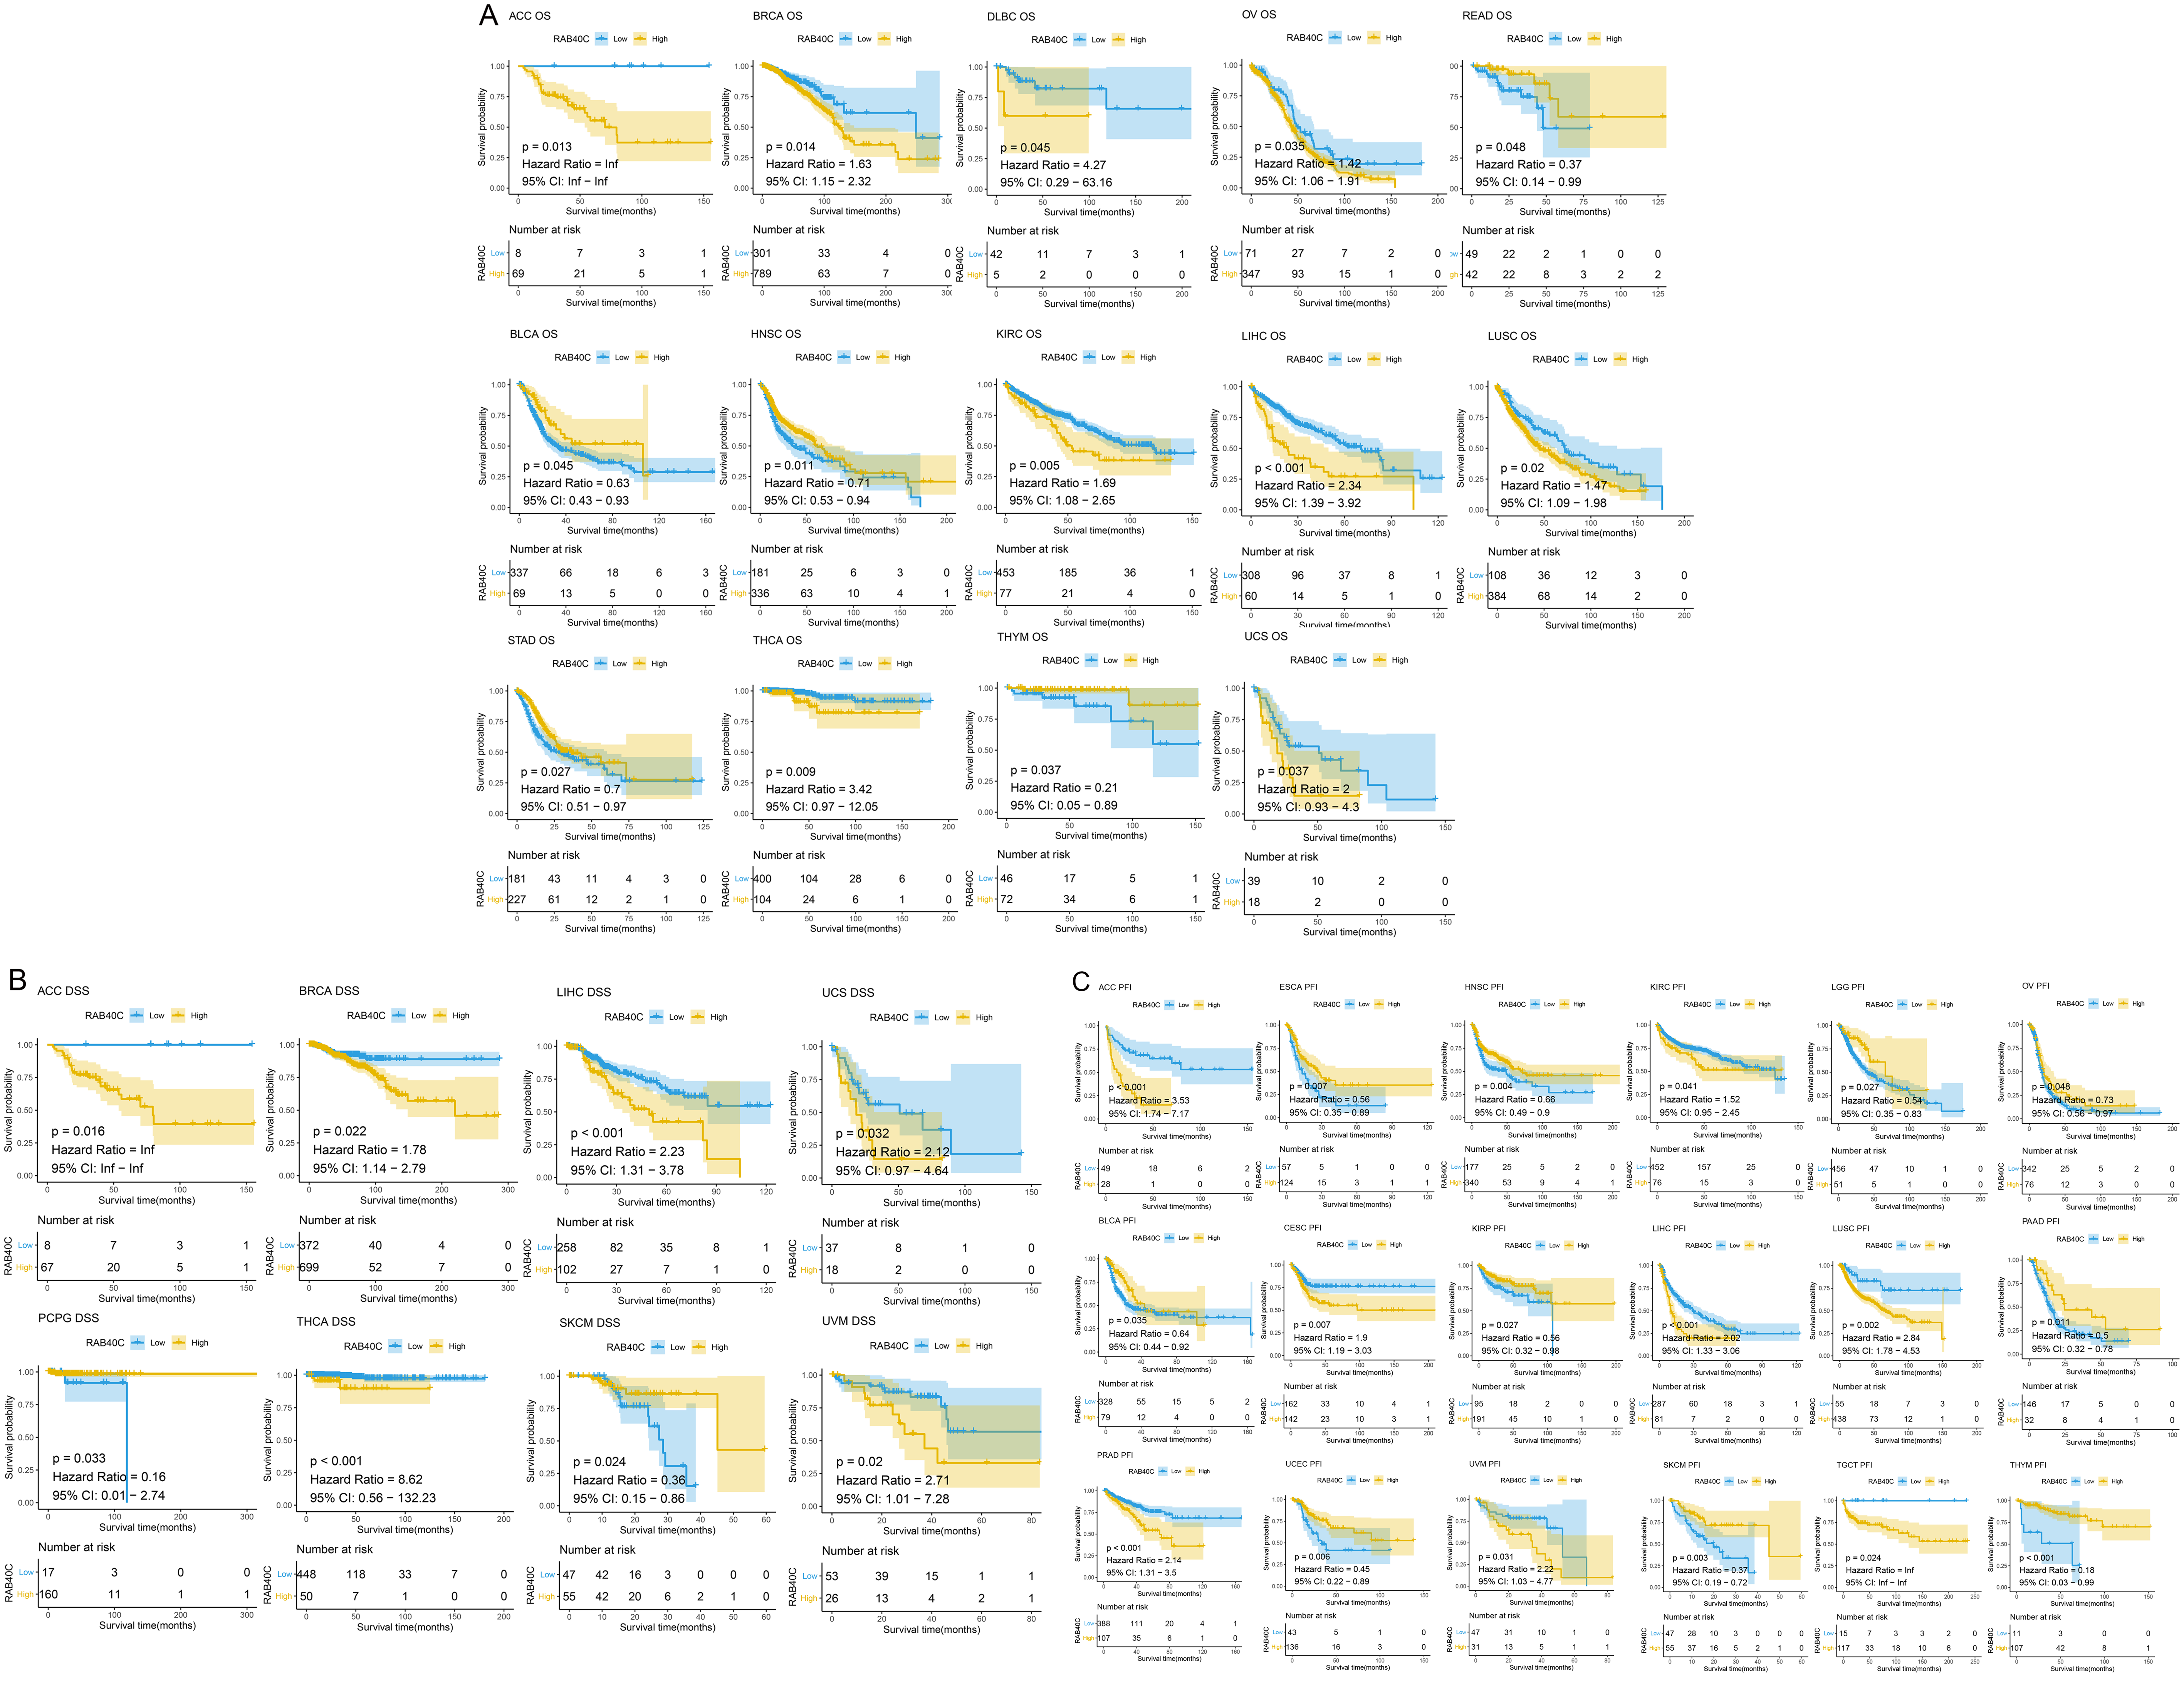


**Supplementary Figure 3.** Kaplan-Meier curves of RAB40C expression for OS (A), DSS (B), and PFI (C) in the prognosis of various kinds of cancer.


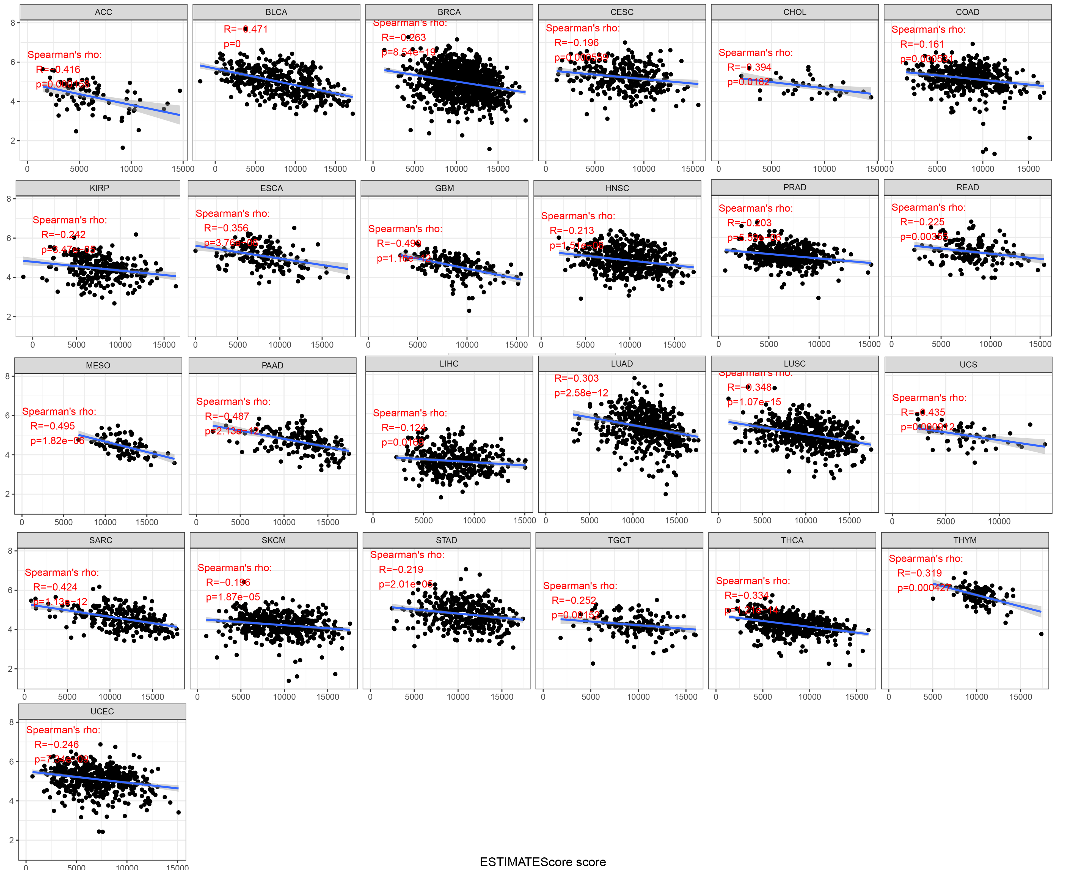


**Supplementary Figure 4.** Association of RAB40C and the ESTIMATE score (*p*<0.05).


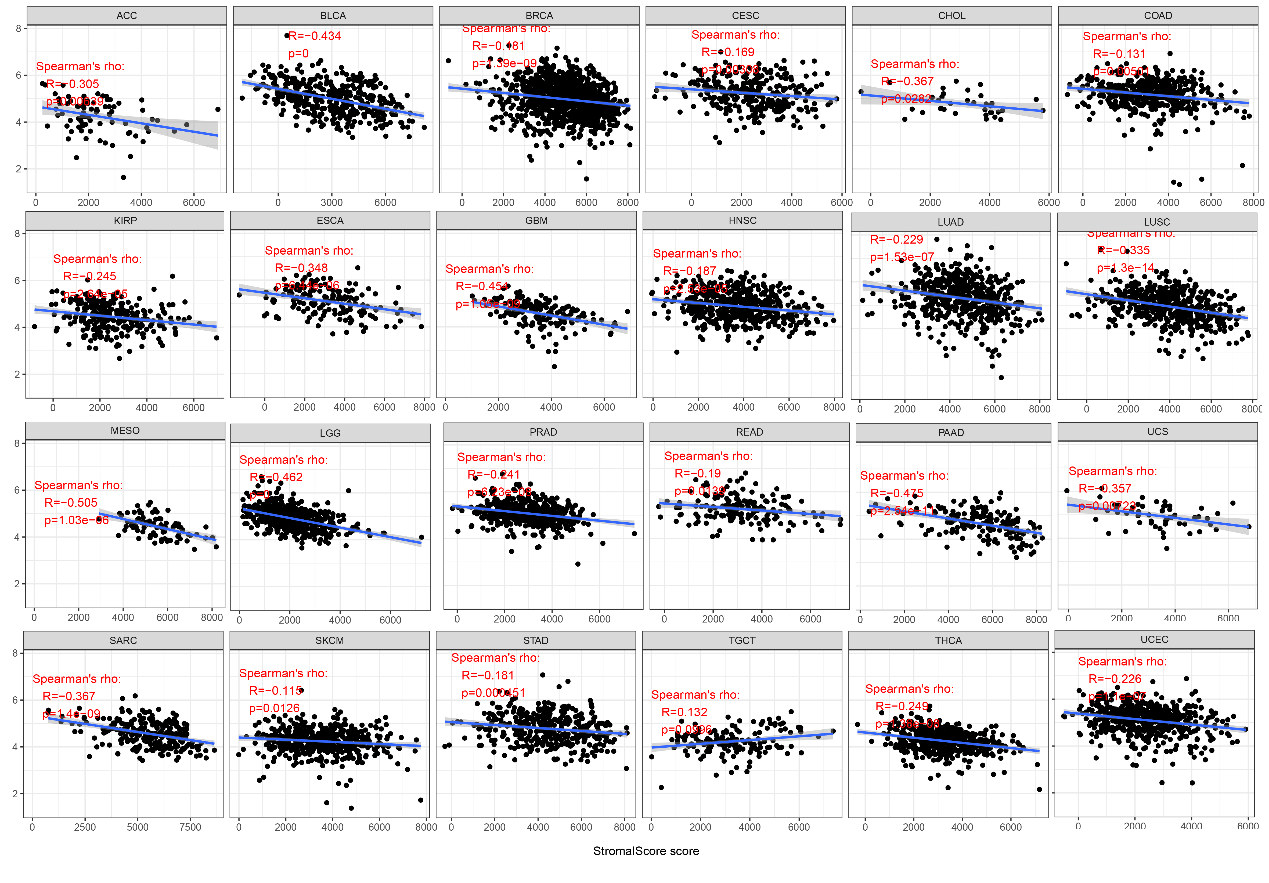


**Supplementary Figure 5.** Association of RAB40C and the Stromal score (*p*<0.05).


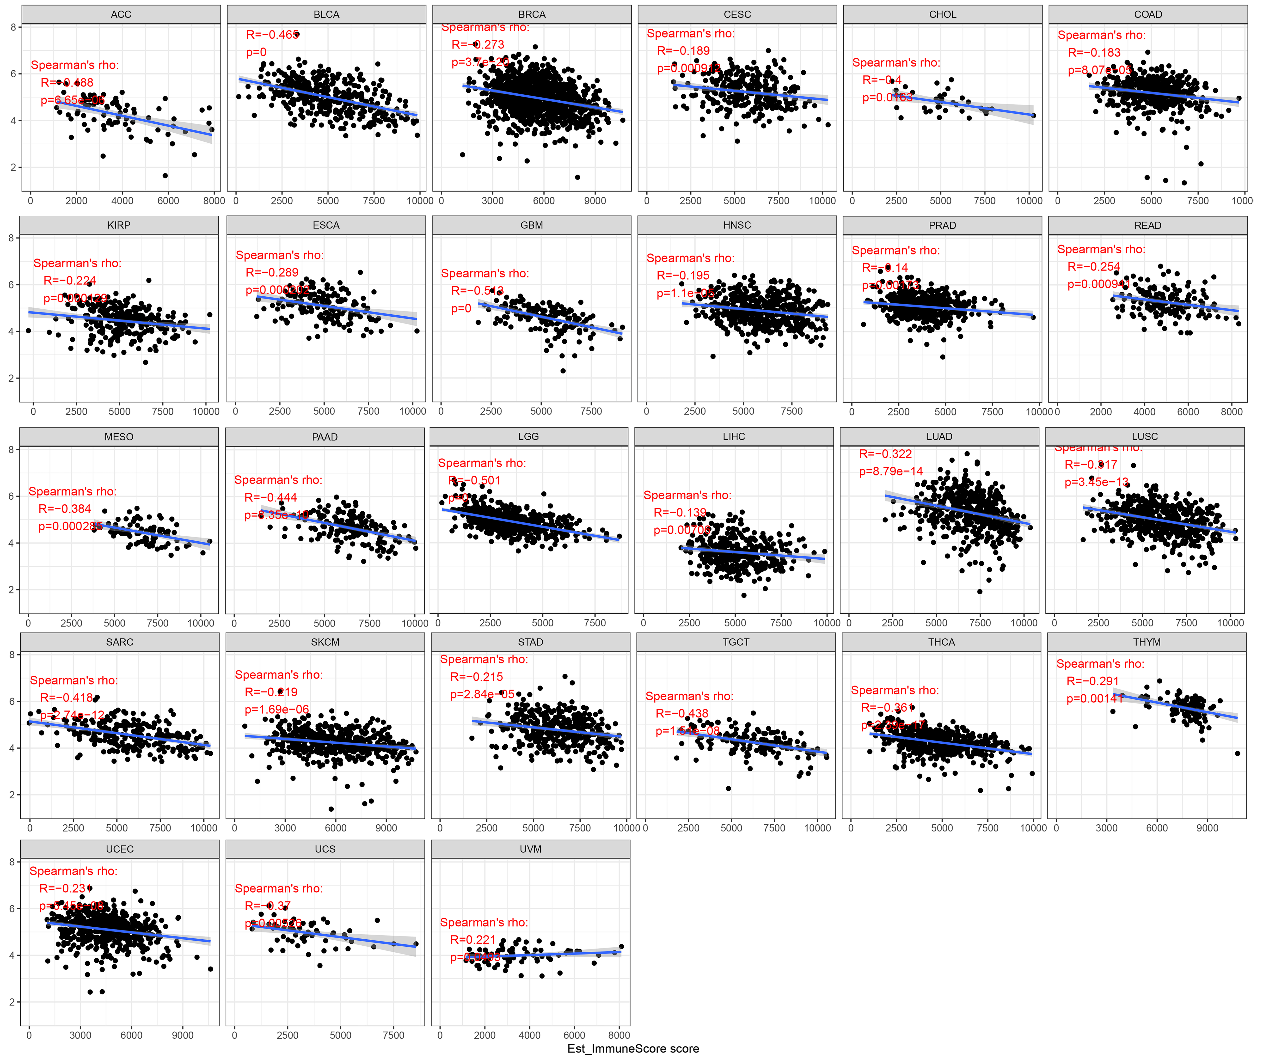


**Supplementary Figure 6.** Association of RAB40C and the Immune score (*p*<0.05).


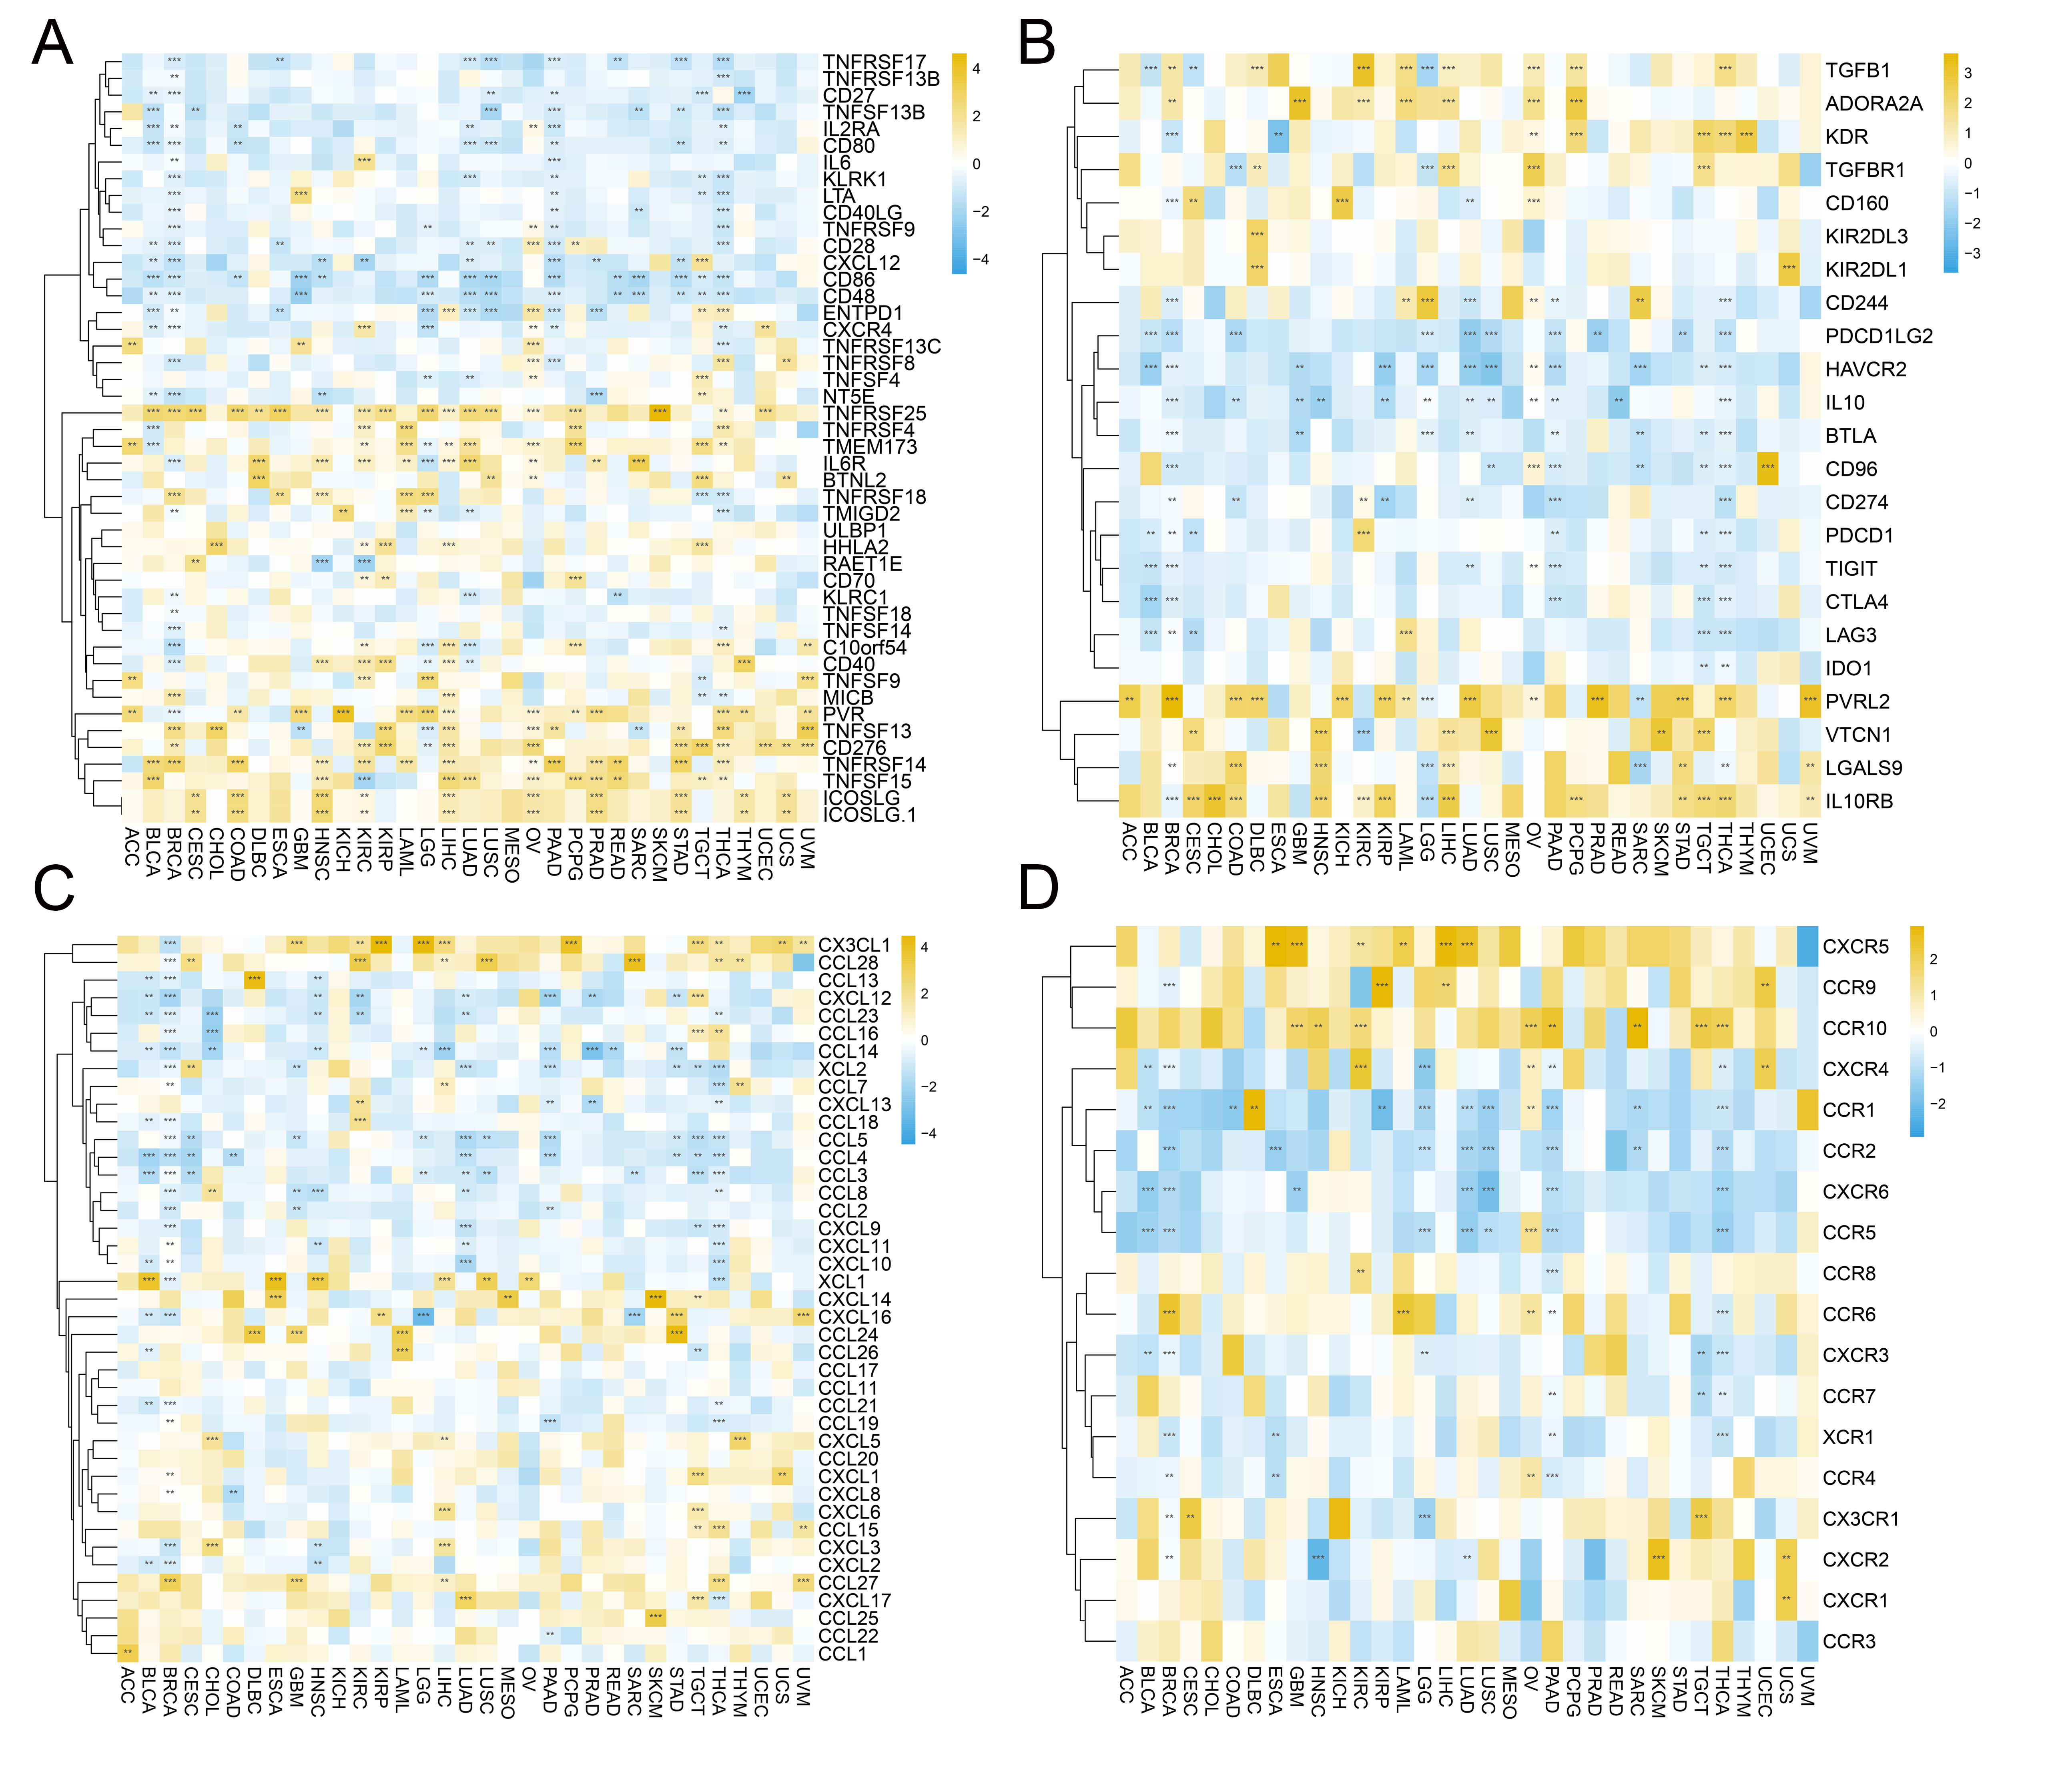


**Supplementary Figure 7.** Regulators and chemokines in different cancers. (A) RAB40C expression linked with immune-activated factors. (B) RAB40C expression linked with immune-suppressed factors. (C) RAB40C expression linked with chemokine ligands. (D) RAB40C expression linked with chemokine receptors. ***p*<0.01; ****p*<0.001.


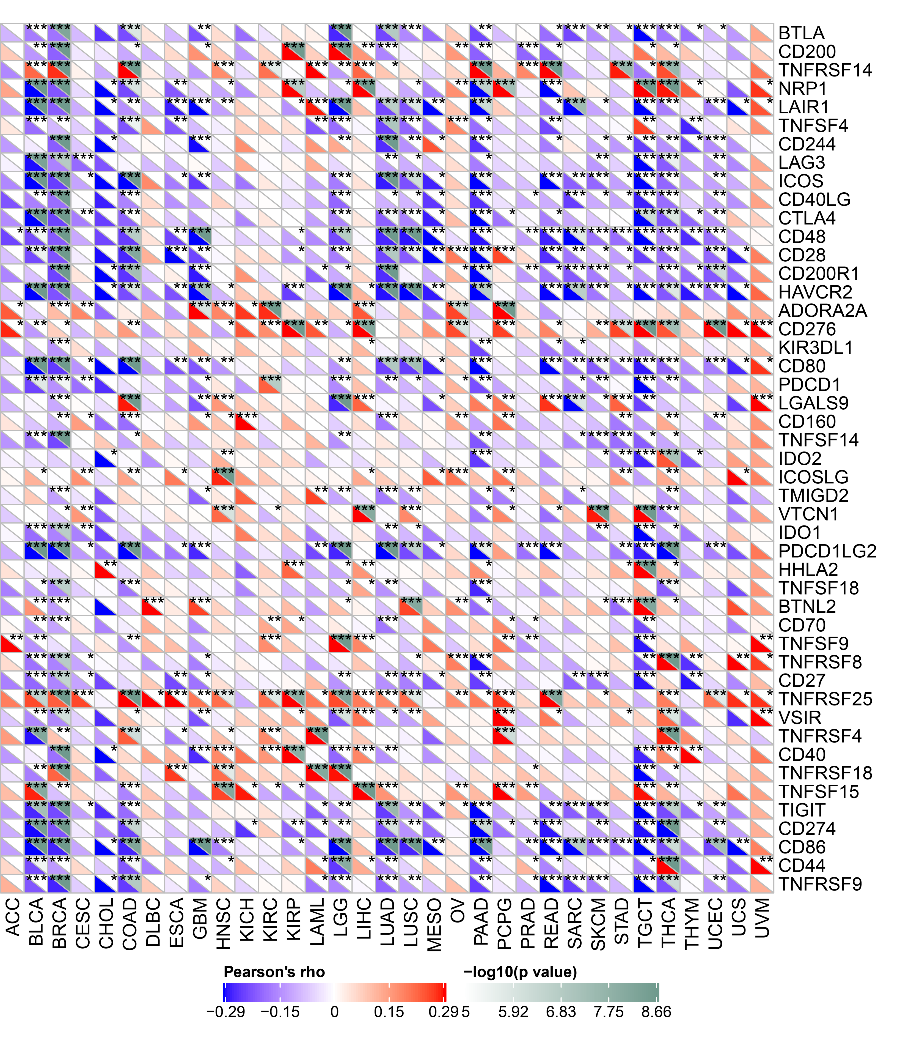


**Supplementary Figure 8.** Analysis of the correlation between RAB40C expression and immune checkpoints in pan-cancer. **p*<0.05; ***p*<0.01; ****p*<0.001.


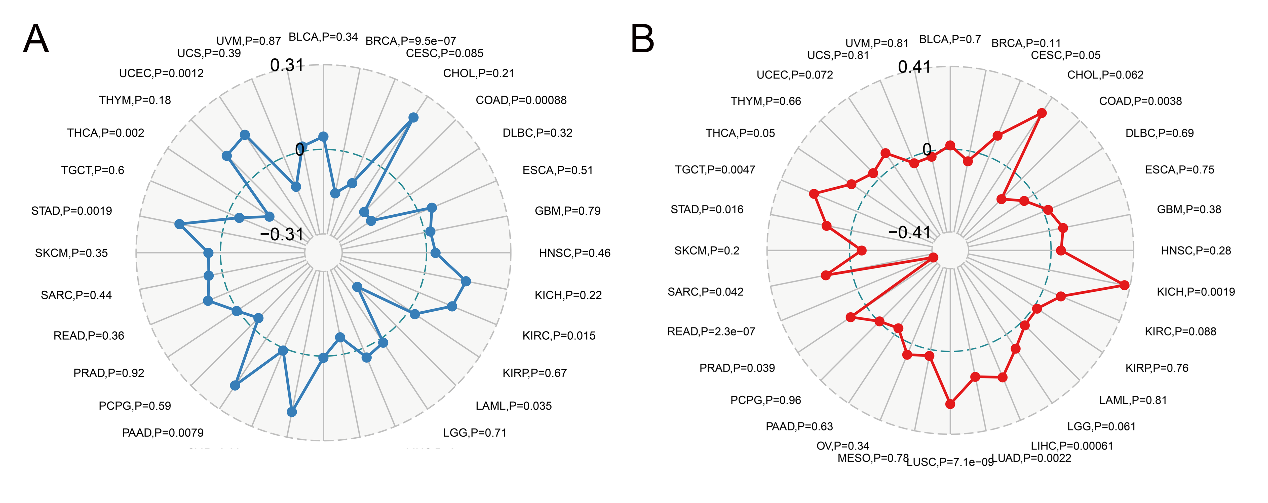


**Supplementary Figure 9** Correlation of RAB40C expression with tumor mutation burden (TMB) (A) and microsatellite instability (MSI) (B) (*p*<0.05).


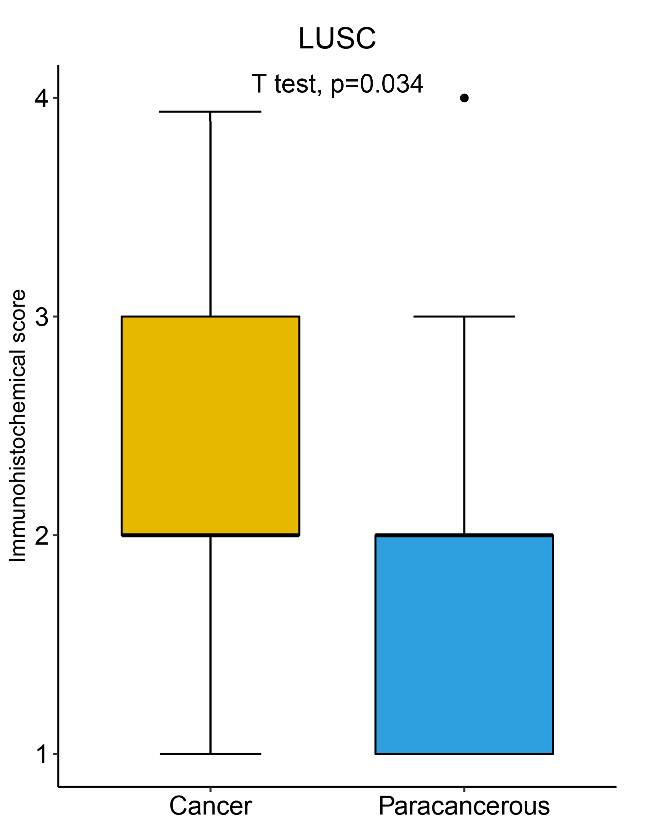


**Supplementary Figure 10.** Immunohistochemical staining results of RAB40C protein in LUSC and paracarcinoma.

**
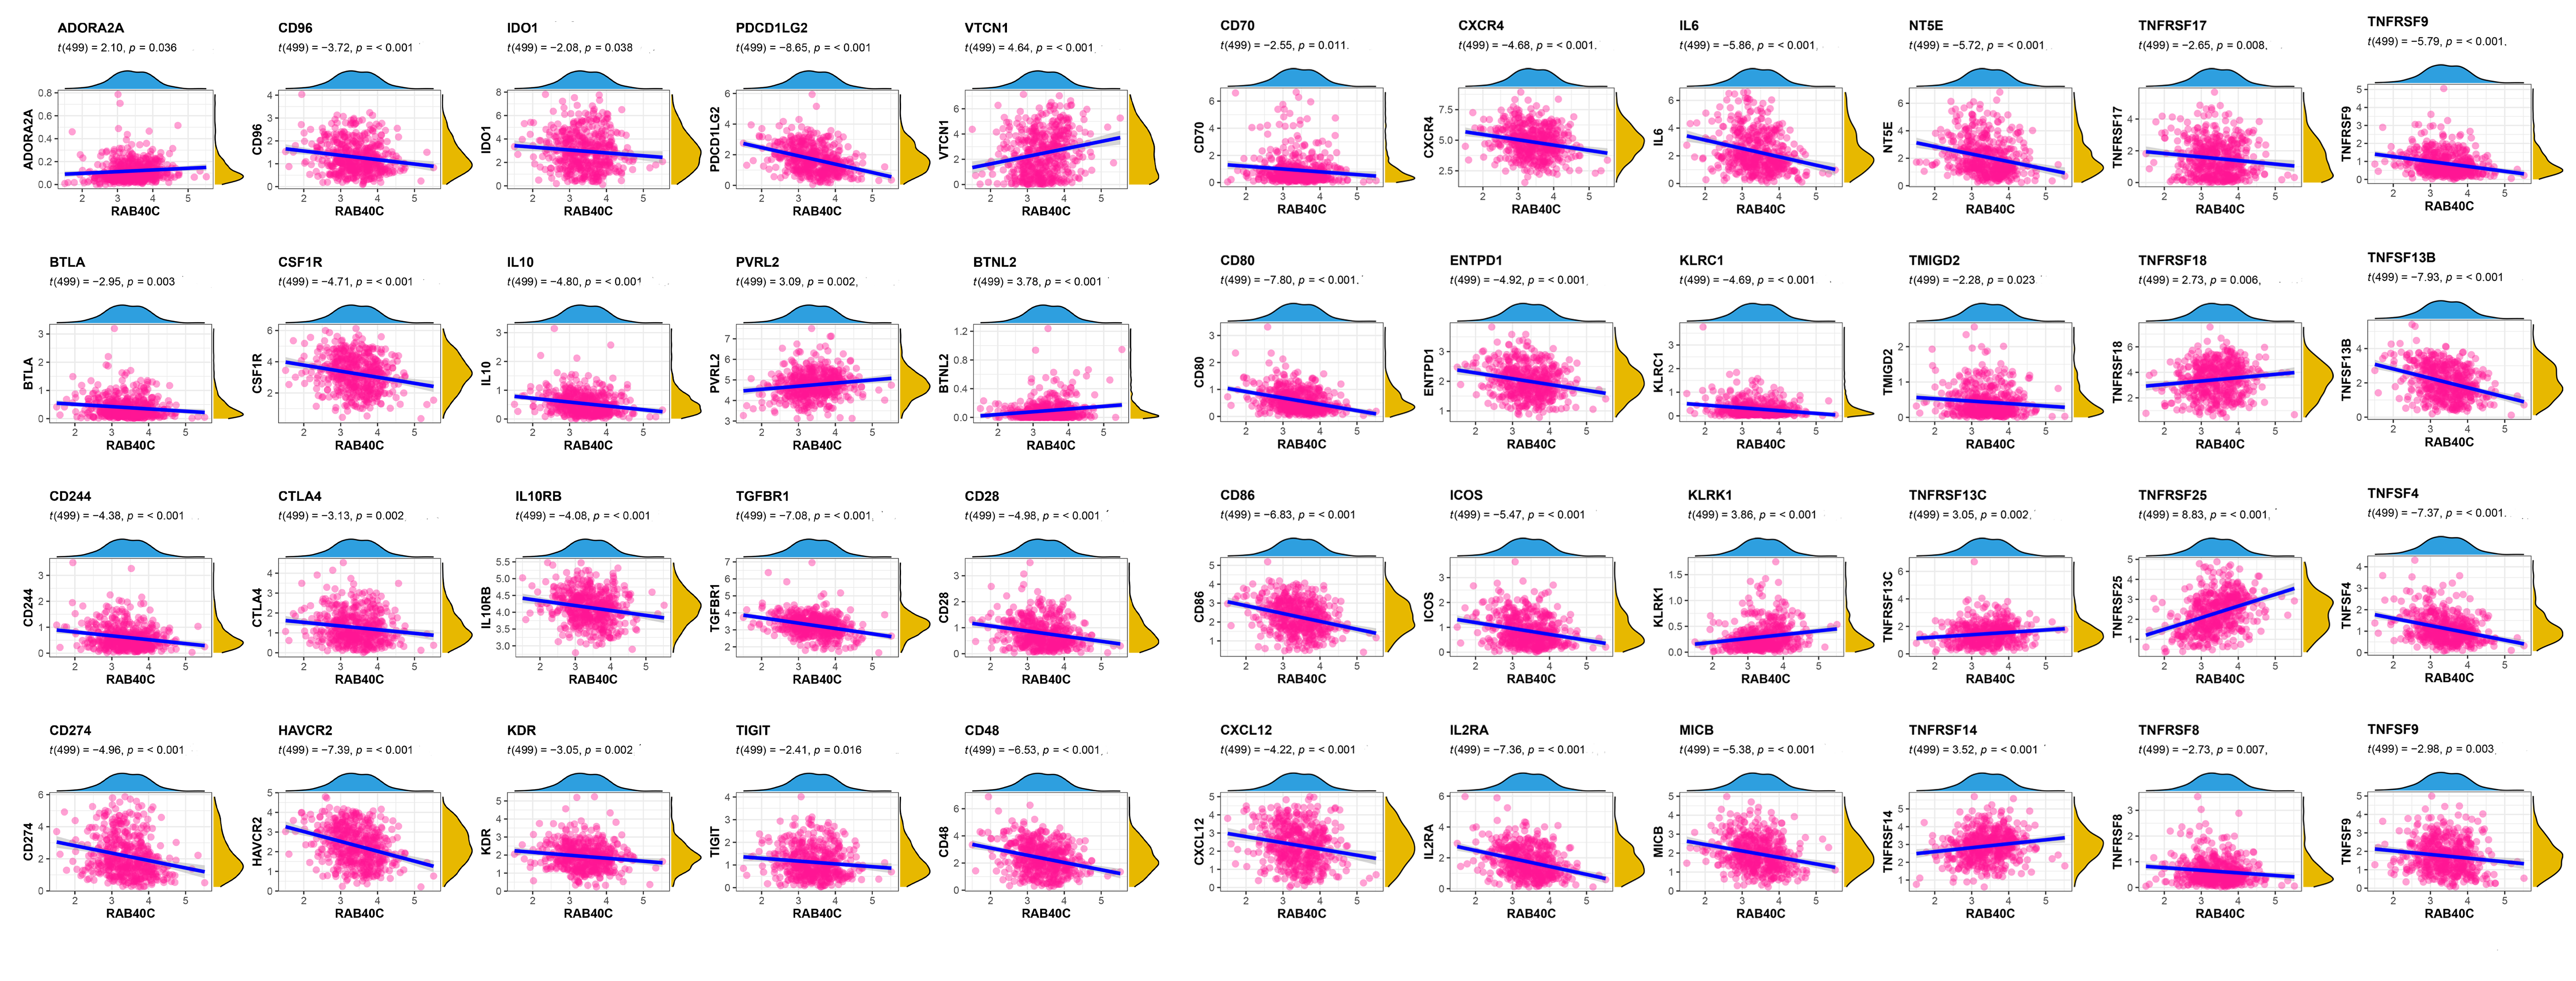
**

**Supplementary Figure 11.** Correlation of immune modulators and RAB40C expression in LUSC (*p*<0.05).
